# Supplementary material for: Synthesis of Fluorescent Carbon Dots as Selective and Sensitive Probes for Cupric Ions and Cell Imaging
Source: PubMed Central journal article supplement (PMC6539694; doi:10.3390/molecules24091785), 2019-05-08
Supplement: molecules-24-01785-s001.pdf [file molecules-24-01785-s001.pdf]

## Supplementary materials

# Synthesis of Fluorescent Carbon Dots as Selective and Sensitive Probes for Cupric Ions and Cell Imaging

Shu-Wei Huang<sup>1</sup>, Yu-Feng Lin<sup>2</sup>, Yu-Xuan Li<sup>1</sup>, Cho-Chun Hu<sup>1</sup> and Tai-Chia Chiu<sup>1,\*</sup>

<sup>1</sup> Department of Applied Science, National Taitung University, 95092 Taitung, Taiwan;

shuwei0615@gmail.com (S.-W.H.); danny861106@gmail.com (Y.-X.L.); cchu@nttu.edu.tw (C.-C.H.)

<sup>2</sup> Department of Biomedical Engineering and Environmental Science, National Tsing Hua University, 30013 Hsinchu, Taiwan; assassin52852@gmail.com (Y.-F.L.)

\*Correspondence: tcchiu@nttu.edu.tw; Tel.: +886-89-517-990

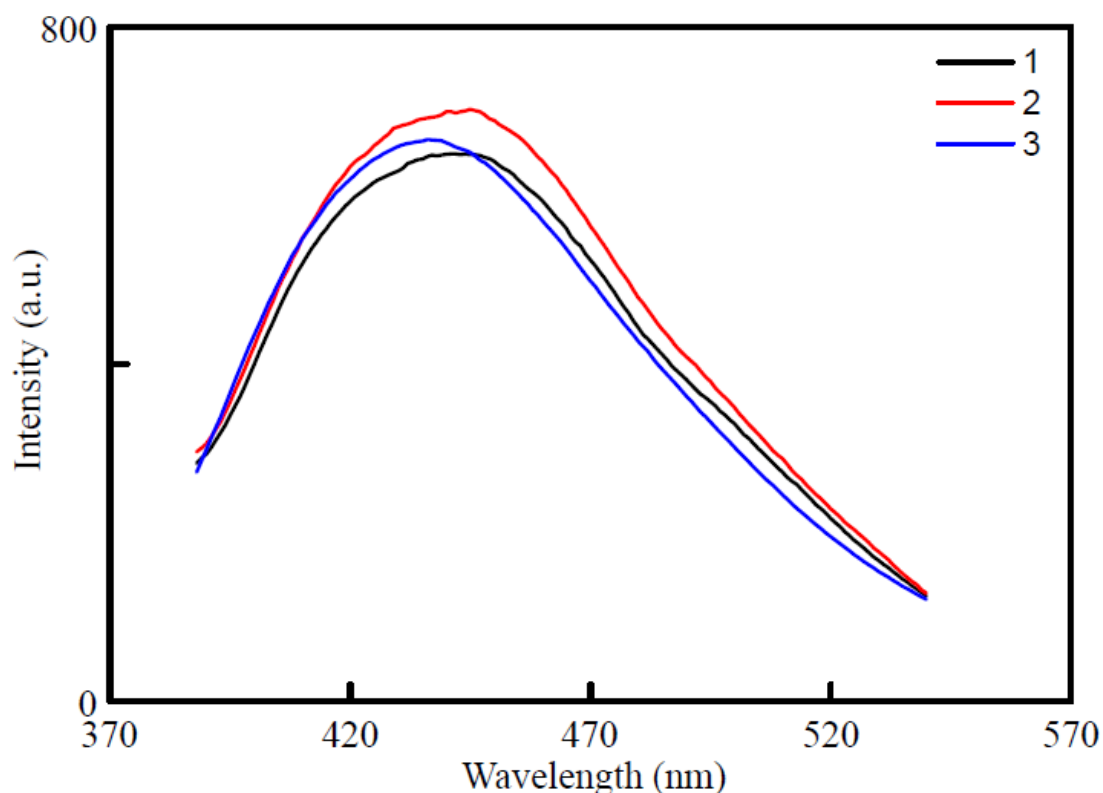

**Figure S1.** The batch-to-batch reproducibility for the synthesis of CDs.

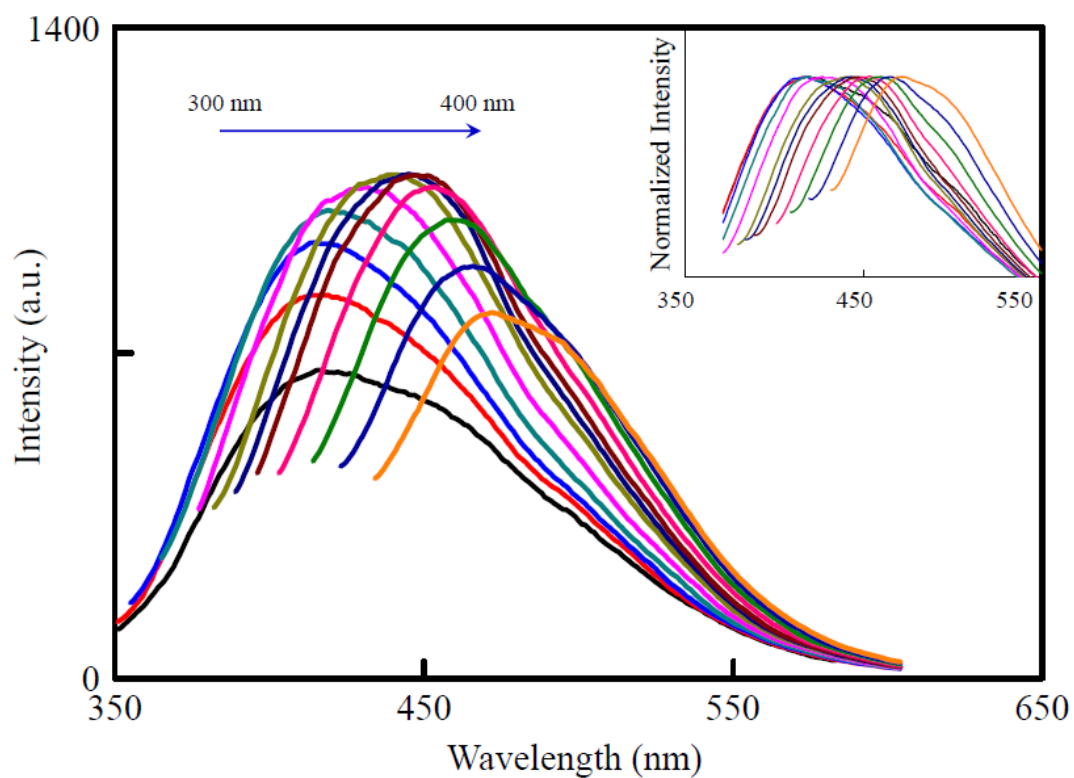

**Figure S2.** Emission spectra of the CDs recorded with progressively longer excitation wavelengths; the values were taken in 10-nm increments. Inset: The normalized fluorescence emission spectra.

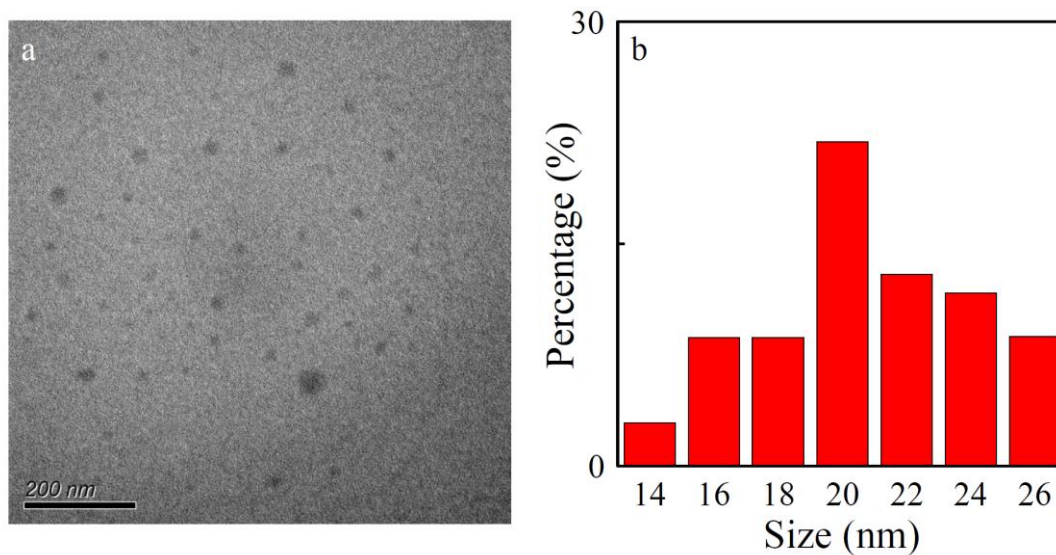

**Figure S3.** (a) TEM image of the CDs. (b) Histogram of the diameters of the CDs. Scale bar: 200 nm.

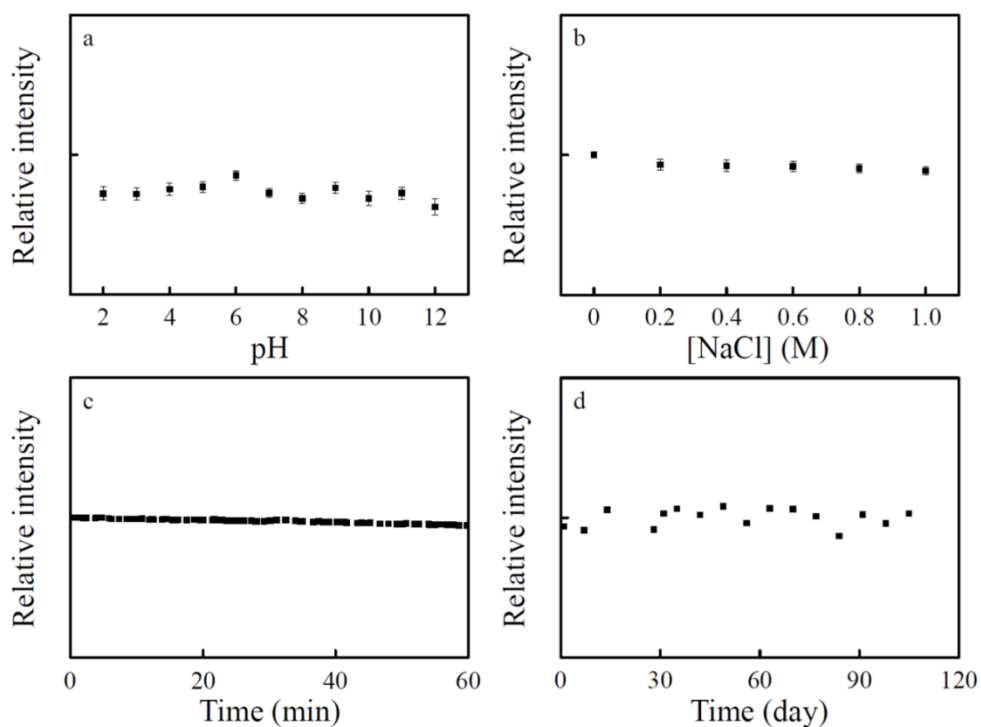

**Figure S4.** (a) Normalized fluorescence intensity of the CDs at different pH levels. (b) Normalized fluorescence intensity of the CDs at different concentrations of NaCl. (c) Normalized fluorescence intensity of the CDs for different amounts of time during which they were irradiated by a UV lamp. (d) Photostability of the CDs as a function of storage time (Excitation wavelength at 355 nm).

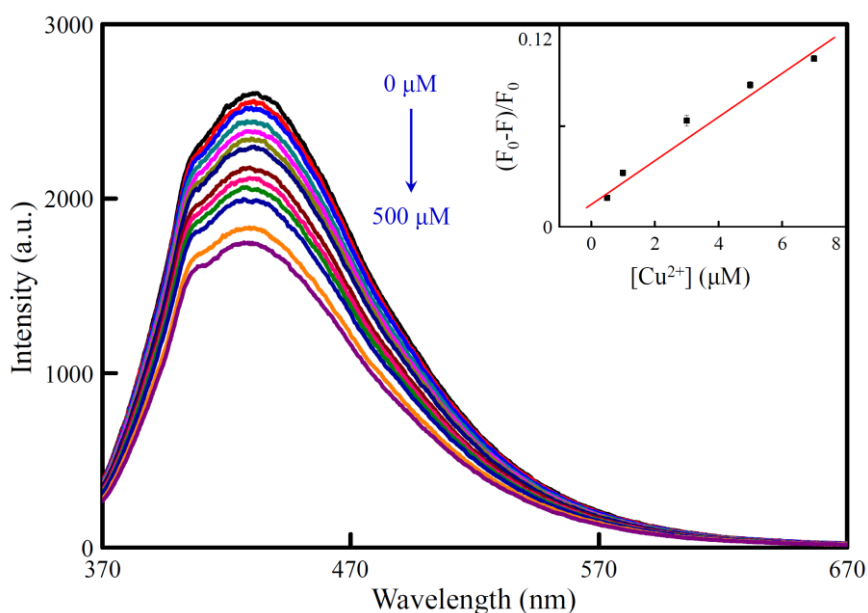

**Figure S5.** Fluorescence responses of the CDs upon the addition of different concentrations of  $\text{Cu}^{2+}$  (0, 0.5, 1.0, 3.0, 5.0, 7.0, 10, 30, 50, 70, 100, 300, and 500  $\mu\text{M}$ ). The inset shows the linear correlation between  $(F_0 - F)/F_0$  and the concentration of  $\text{Cu}^{2+}$ .

**Table S1.** Optimization of the synthetic parameters of CDs for Cu<sup>2+</sup> detection.

| PVP (g) | CYS (g) | Temperature (°C) | Time (h) | QY (%) | ( <i>F</i> <sub>0</sub> - <i>F</i> )/ <i>F</i> <sub>0</sub> |
|---------|---------|------------------|----------|--------|-------------------------------------------------------------|
| 0.50    | 0.50    | 180              | 6        | 6.8%   | 0.09                                                        |
| 0.50    | 0.50    | 180              | 12       | 7.6%   | 0.22                                                        |
| 0.50    | 0.50    | 180              | 18       | 4.8%   | 0.05                                                        |
| 0.50    | 0.50    | 140              | 12       | 4.7%   | 0.07                                                        |
| 0.50    | 0.50    | 220              | 12       | 9.4%   | 0.05                                                        |
| 0.75    | 0.25    | 180              | 12       | 9.3%   | 0.05                                                        |
| 0.25    | 0.75    | 180              | 12       | 3.3%   | 0.03                                                        |

*F*<sub>0</sub> and *F* are the fluorescence intensities of the probes at 455 nm in the absence and presence of the Cu<sup>2+</sup> ions (10 μM), respectively.

**Table S2.** Comparison of linear range and LODs for Cu<sup>2+</sup> detection of different carbon dots-based methods.

| Reaction Materials                                                    | Synthetic Approach  | QY     | Detection Technique | Linear Range (μM) | LODs (μM) | Reference |
|-----------------------------------------------------------------------|---------------------|--------|---------------------|-------------------|-----------|-----------|
| <i>o</i> -Phenylenediamine, dithiothreitol                            | Solvothermal        | ~23%   | Turn off            | –                 | 2         | [1]       |
| Ammonium citrate                                                      | Heating             | –      | Turn off            | 0.001–0.200       | 0.0004    | [2]       |
| <i>Acacia concinna</i> seeds                                          | Microwave           | 10.20% | Turn off            | 0.01–10           | 0.0043    | [3]       |
| Sulfamide, <i>m</i> -phenylenediamine                                 | Solvothermal        | 78.6%  | Turn off            | 2–60              | 0.29      | [4]       |
| Lily bulbs                                                            | Microwave           | 17.6%  | Turn off            | 0.05–2            | 0.0013    | [5]       |
| Citric acid, ethylenediamine                                          | Hydrothermal        | 32.25% | Turn on             | 0–60              | 0.0031    | [6]       |
| Waste polyolefin                                                      | Ultrasonic          | 4.84%  | Turn off            | 1–8               | 0.0006    | [7]       |
| Hexamethylenetetramine                                                | Hydrothermal        | 21.7%  | Turn off            | 0.1–40            | 0.09      | [8]       |
| Citric acid, L-cysteine, dextrin                                      | Microwave           | 22%    | Turn off            | 0–30              | 0.002     | [9]       |
| Sugarcane juice                                                       | Hydrothermal        | 10.7%  | Turn off            | 5.12–100          | 0.76      | [10]      |
| Glucose, H <sub>3</sub> PO <sub>4</sub> , polyethylene glycol diamine | Heating             | 25%    | Turn off            | 0.004–0.400       | 0.0015    | [11]      |
| Glucose, NH <sub>3</sub> , hydrogen peroxide                          | Hydrothermal        | 32.8%  | Turn off            | 0.1–20            | 0.0056    | [12]      |
| Citric acid, tris(hydroxymethyl)methyl aminomethane                   | Hydrothermal        | 62%    | Turn off            | 0–10              | 0.21      | [13]      |
| Phytic acid, sodium citrate                                           | Hydrothermal        | 3.5%   | Turn off            | 0–0.0020          | 0.001     | [14]      |
| Citric acid, histidine                                                | Solid-phase thermal | 16%    | Turn off            | 0.6–30            | 0.19      | [15]      |
| Polyvinylpyrrolidone, L-cysteine                                      | Hydrothermal        | 7.6%   | Turn off            | 0.5–7.0           | 0.15      | This work |

## References:

1. Ju, B.; Zhang, T.; Li, S.; Liu, J.; Zhang, W.; Li, M.; Zhang, S.X.-A. Fingerprint identification of copper ions with absorption and emission dual-mode responses by N,S co-doped red carbon dots. *New J. Chem.* **2019**, *43*, 168-174.
2. Sun, Y.; Wei, M.; Liu, R.; Wang, H.; Li, H.; Kang, Q.; Shen, D. A smartphone-based ratiometric fluorescent device for field analysis of

soluble copper in river water using carbon quantum dots as luminophore. *Talanta* **2019**, *194*, 452-460.

3. Bhamore, J.R.; Jha, S.; Park, T.J.; Kailasa, S.K. Fluorescence sensing of Cu<sup>2+</sup> ion and imaging of fungal cell by ultra-small fluorescent carbon dots derived from Acacia concinna seeds. *Sens. Actuator B-Chem.* **2018**, *277*, 47-54.
4. Dai, Y.; Liu, Z.; Bai, Y.; Chen, Z.; Qin, J.; Feng, F. A novel highly fluorescent S, N, O co-doped carbon dots for biosensing and bioimaging of copper ions in live cells. *RSC Adv.* **2018**, *8*, 42246-42252.
5. Gu, D.; Zhang, P.; Zhang, L.; Liu, H.; Pu, Z.; Shang, S. Nitrogen and phosphorus co-doped carbon dots derived from lily bulbs for copper ion sensing and cell imaging. *Opt. Mater.* **2018**, *83*, 272-278.
6. Kuang, Y.; Chen, L.; Lu, J.; Tian, X.; Yang, C.; Li, Y.; Lu, L.; Nie, Y. A carbon-dot-based dual-emission probe for ultrasensitive visual detection of copper ions. *New J. Chem.* **2018**, *42*, 19771-19778.
7. Kumari, A.; Kumar, A.; Sahu, S.K.; Kumar, S. Synthesis of green fluorescent carbon quantum dots using waste polyolefins residue for Cu<sup>2+</sup> ion sensing and live cell imaging. *Sens. Actuator B-Chem.* **2018**, *254*, 197-205.
8. Liao, S.; Huang, X.; Yang, H.; Chen, X. Nitrogen-doped carbon quantum dots as a fluorescent probe to detect copper ions, glutathione, and intracellular pH. *Anal. Bioanal. Chem.* **2018**, *410*, 7701-7710.
9. Liu, Q.; Zhang, N.; Shi, H.; Ji, W.; Guo, X.; Yuan, W.; Hu, Q. One-step microwave synthesis of carbon dots for highly sensitive and selective detection of copper ions in aqueous solution. *New J. Chem.* **2018**, *42*, 3097-3101.
10. Moreira, V.A.; Toito Suarez, W.; de Oliveira Krambeck Franco, M.; Gambarra Neto, F.F. Eco-friendly synthesis of cuprizone-functionalized luminescent carbon dots and application as a sensor for the determination of copper(II) in wastewater. *Anal. Methods* **2018**, *10*, 4570-4578.
11. Omer, K.M. Highly passivated phosphorous and nitrogen co-doped carbon quantum dots and fluorometric assay for detection of copper ions. *Anal. Bioanal. Chem.* **2018**, *410*, 6331-6336.
12. Tam, T.V.; Choi, W.M. One-pot synthesis of highly fluorescent amino-functionalized graphene quantum dots for effective detection of copper ions. *Curr. Appl. Phys.* **2018**, *18*, 1255-1260.
13. Yan, F.; Bai, Z.; Chen, Y.; Zu, F.; Li, X.; Xu, J.; Chen, L. Ratiometric fluorescent detection of copper ions using coumarin-functionalized carbon dots based on FRET. *Sens. Actuator B-Chem.* **2018**, *275*, 86-94.

14. Yang, F.; He, X.; Wang, C.; Cao, Y.; Li, Y.; Yan, L.; Liu, M.; Lv, M.; Yang, Y.; Zhao, X., et al. Controllable and eco-friendly synthesis of P-riched carbon quantum dots and its application for copper (II) ion sensing. *Appl. Surf. Sci.* **2018**, *448*, 589-598.
15. Zhao, L.; Li, H.; Xu, Y.; Liu, H.; Zhou, T.; Huang, N.; Li, Y.; Ding, L. Selective detection of copper ion in complex real samples based on nitrogen-doped carbon quantum dots. *Anal. Bioanal. Chem.* **2018**, *410*, 4301-4309.
